# Supplementary material for: Cryo-EM reveals structural basis for human AIM/CD5L recognition of polymeric immunoglobulin M
Source: PubMed Central journal article supplement (PMC11525585; doi:10.1038/s41467-024-53615-5), 2024-10-30
Supplement: 41467_2024_53615_MOESM1_ESM.pdf [file 41467_2024_53615_MOESM1_ESM.pdf]

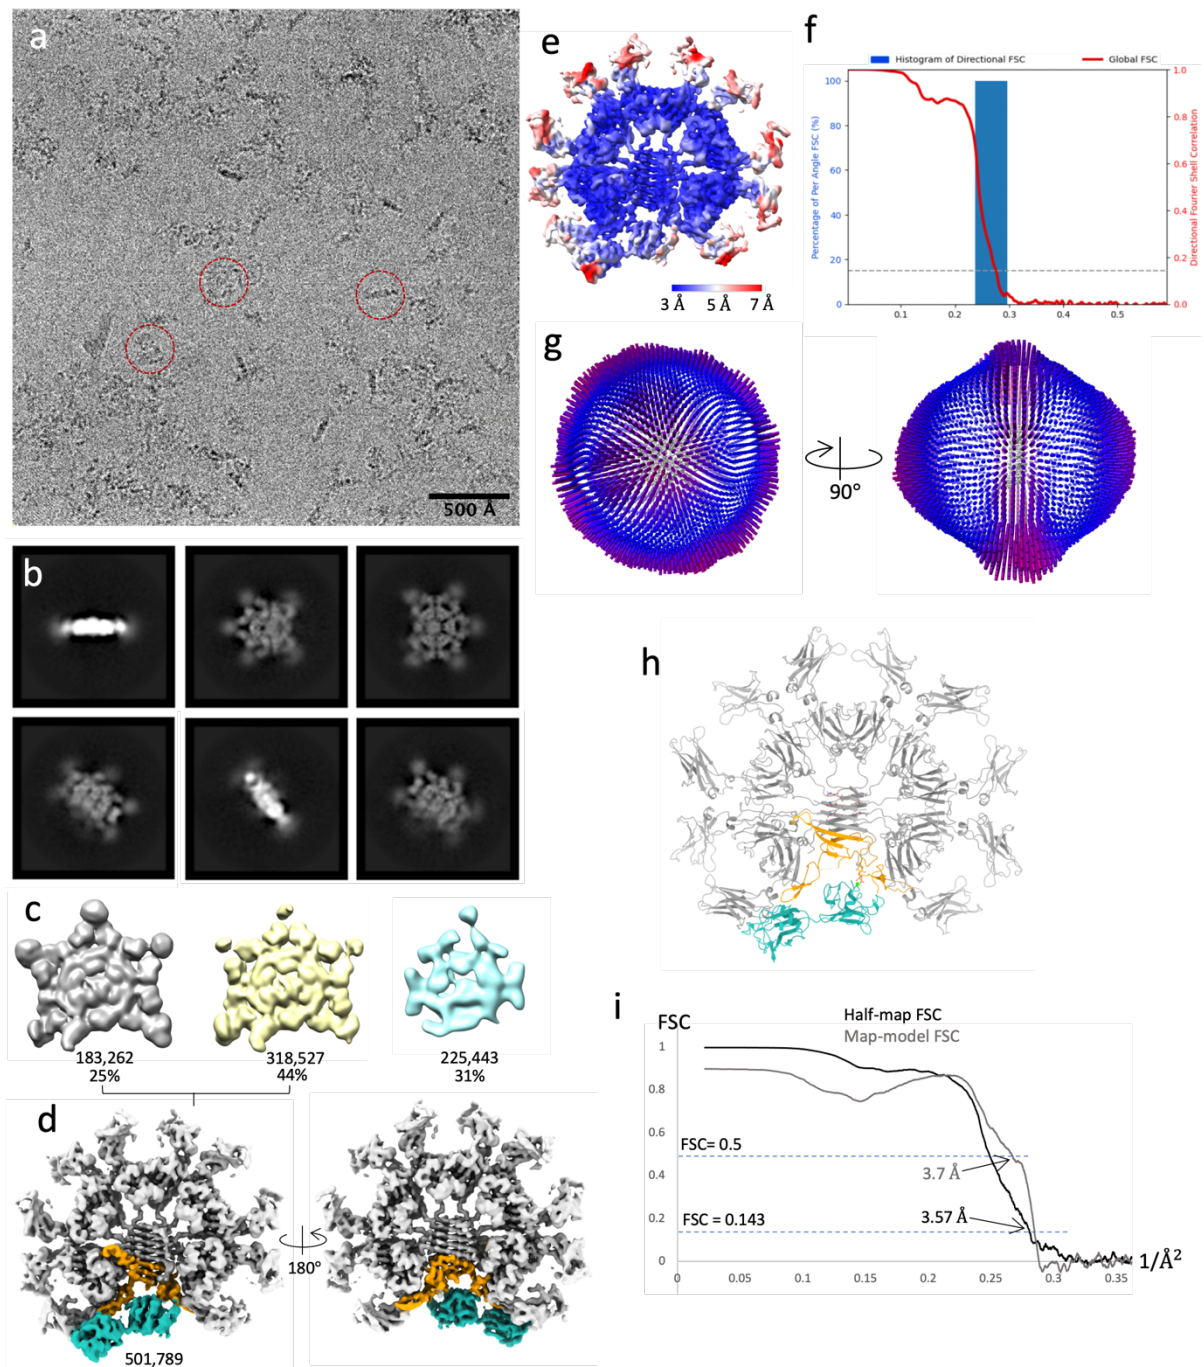

**Supplementary Fig. 1. Single particle analysis of Fc $\mu$ /J/AIM complex.** (a) A typical cryo-EM micrograph of the Fc $\mu$ /J/AIM complex with particles circled. (b) Typical 2D averages of the complex showing various orientations of the particles. (c) 3D classes of the complex. The first two were selected for further refinement in (d). Fc $\mu$  is coloured in grey, J chain in orange, and AIM in cyan. (e) Local resolution of the refined map calculated in Cryosparc. (f) 3DFSC histogram calculated in Cryosparc of the refined map showing overall isotropic resolution. (g) Angular distribution of the particles for the refined map. The left panel has the same orientation as (e). (h) Model of Fc $\mu$ /J/AIM complex. Fc $\mu$  chains are in grey, J chain is in orange and AIM in cyan. (i) Fourier shell correlation (FSC) with 3.57 Å resolution at 0.143 cut-off and map-model FSC showing 3.7 Å resolution at 0.5 cut-off for the model (calculated using Phenix program suite).

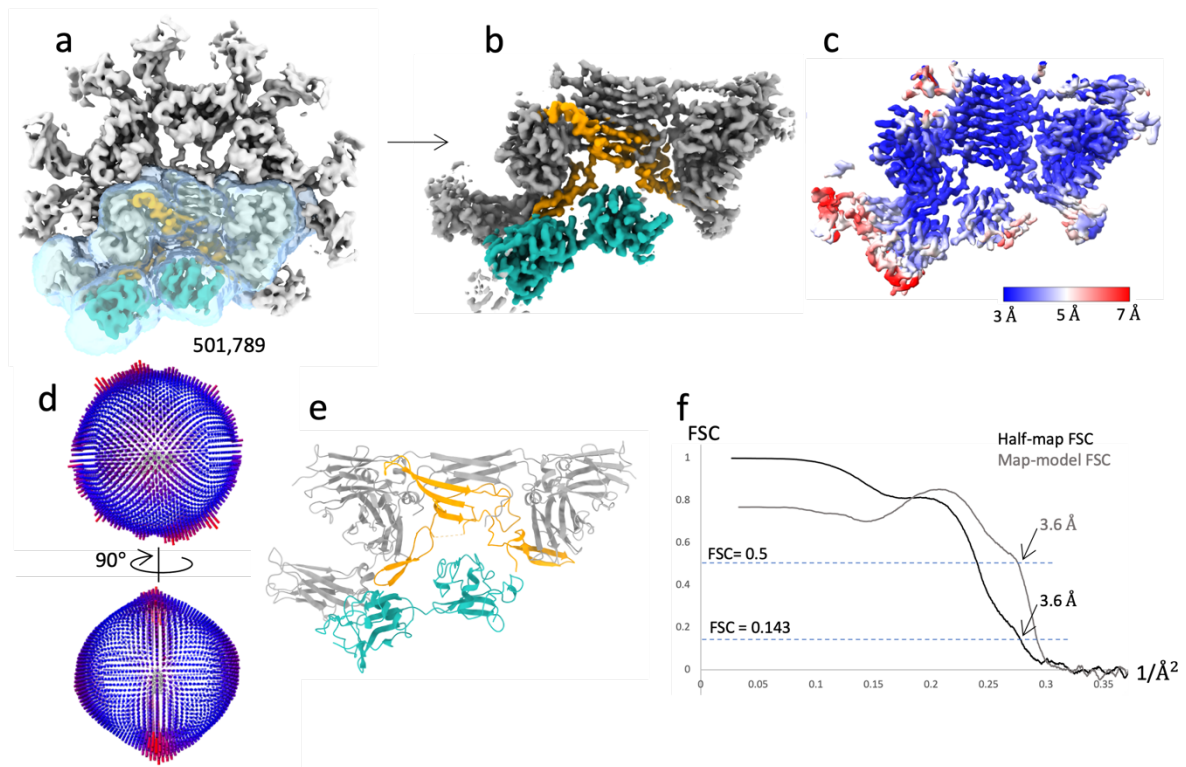

**Supplementary Fig. 2. Single particle focused refinement at the IgM/AIM interface.** (a) Refined complex map as in Supplementary Fig.1d showing the mask around the IgM/AIM interface applied to local refinement. (b) Postprocessed local refinement map. (c) Local resolution of the focused refined map calculated in Cryosparc. (d) Angular distribution of the particles for the focused refined map. The left panel has the same orientation as (b). (e) Atomic model for the focused refined map. (f) FSC plots with 3.6 Å resolution at 0.143 cut-off and map-model FSC plot showing 3.6 Å resolution at 0.5 cut-off (calculated using Phenix program suite).

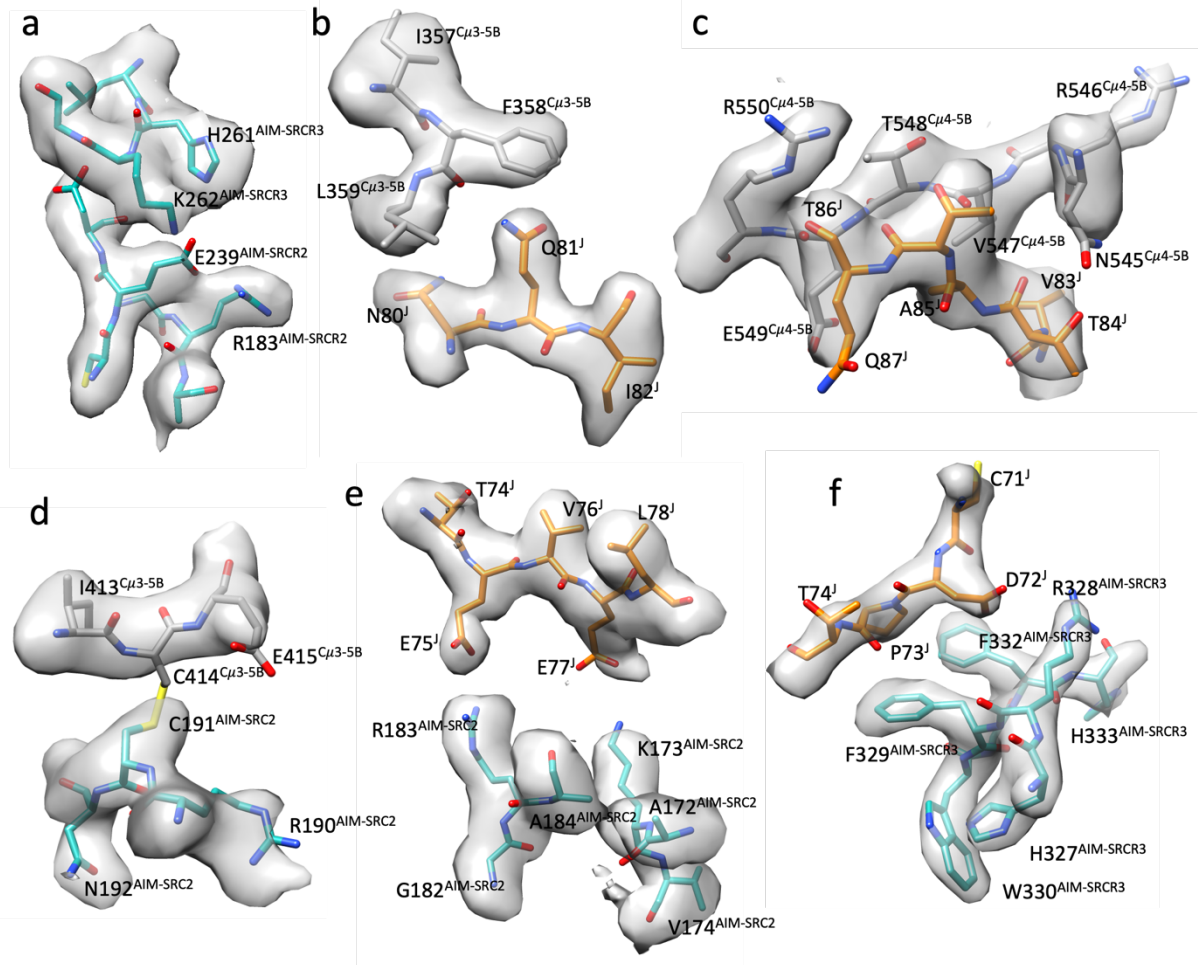

**Supplementary Fig. 3. Density maps of key regions at Fc $\mu$ /J/AIM complex binding interface.** (a) SRCR2-linker-SRCR3 interacting residues. Contour level  $t=0.2$  ( $13\sigma$ ). (b-c) Interacting residues at Fc $\mu$ /J interface.  $t=0.22$  ( $14.5\sigma$ ). (d) Interacting residues at Fc $\mu$ /AIM interface.  $t=0.2$  ( $13\sigma$ ). (e-f) Interacting residues at J/AIM interface.  $t=0.2$  ( $13\sigma$ ) in (e),  $t=0.27$  ( $17.8\sigma$ ) in (f).

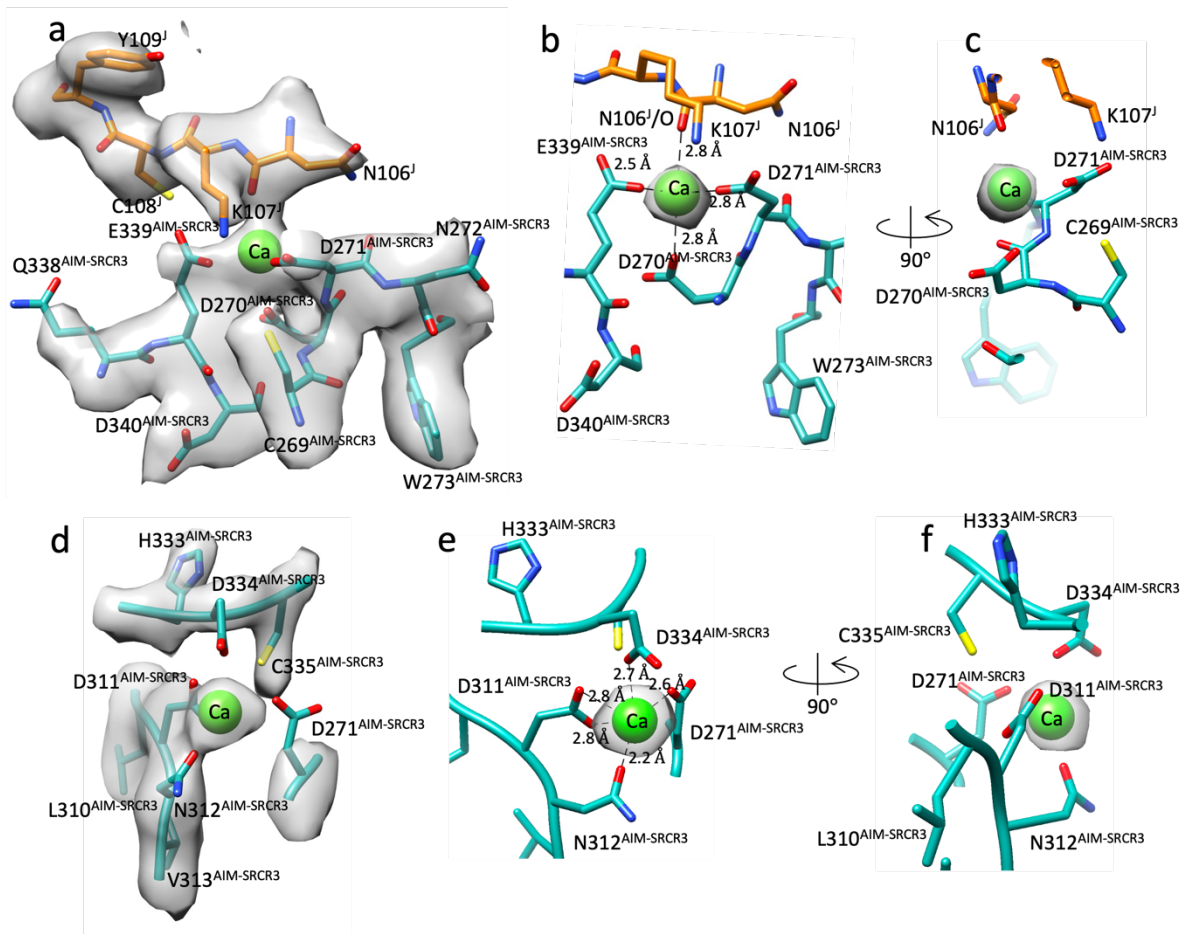

**Supplementary Fig. 4. Local density maps for the two AIM SRCR3 calcium binding sites.** (a-b) First calcium binding site that interacts with J chain.  $t=0.18$  ( $11.9\sigma$ ). (b) Same interactions in (a) with calcium-oxygen distances. The density of calcium ion is shown at a higher contour level ( $t=0.24$  ( $15.8\sigma$ )) than (a). (c) Orthogonal view of (b). (d) Second calcium binding site.  $t=0.22$  ( $14.5\sigma$ ). (e) Same interactions in (d) with calcium-oxygen distances. The density of calcium ion is shown at a higher contour level ( $t=0.24$  ( $15.8\sigma$ )) than (d). (f) Orthogonal view of (e).

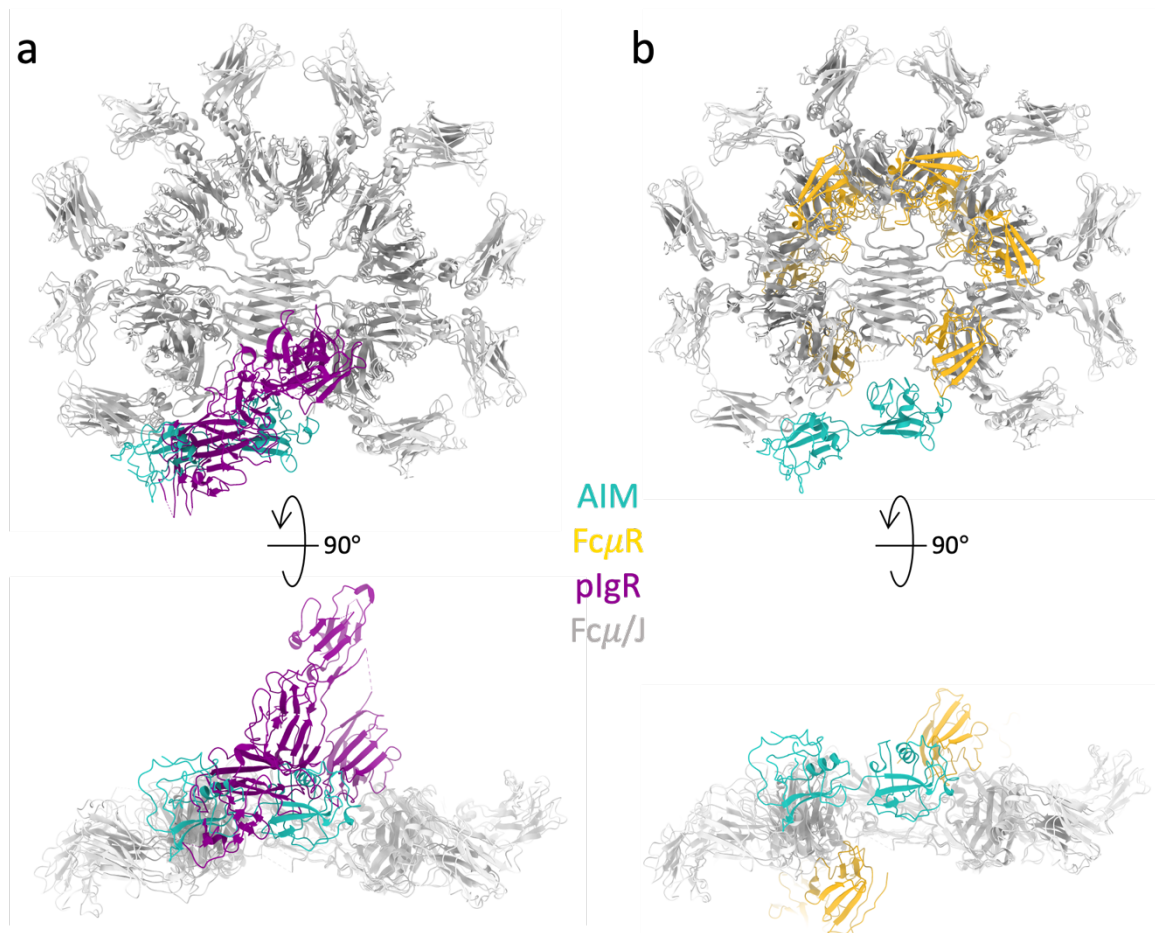

**Supplementary Fig. 5. Compatibility of AIM and IgM receptors on IgM.** (a) AIM and pIgR models at their respective IgM binding sites show significant clashes. (b) AIM and FcμR models at their respective IgM binding sites superposed on the same IgM core model without clashes.

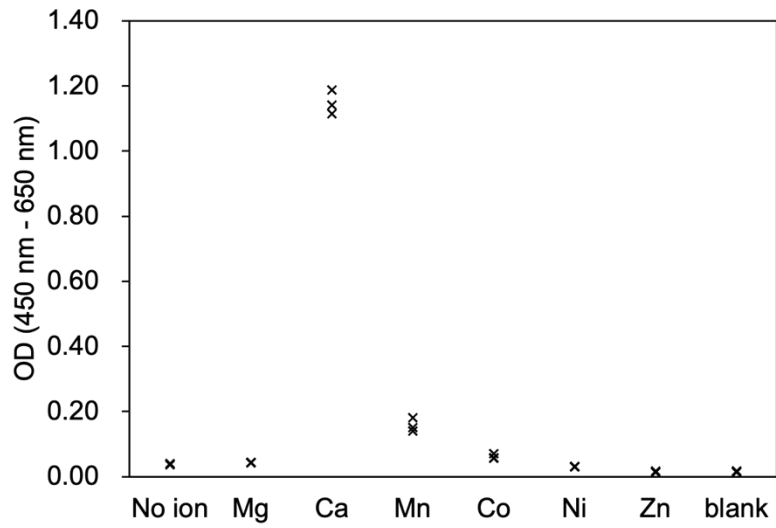

**Supplementary Fig. 6. Effect of divalent cations on AIM/IgM binding in an ELISA-based assay.** Three technical replicates for each cation are shown as individual data points. The data is representative of two biological replicates. Source data are provided as a Source Data file.

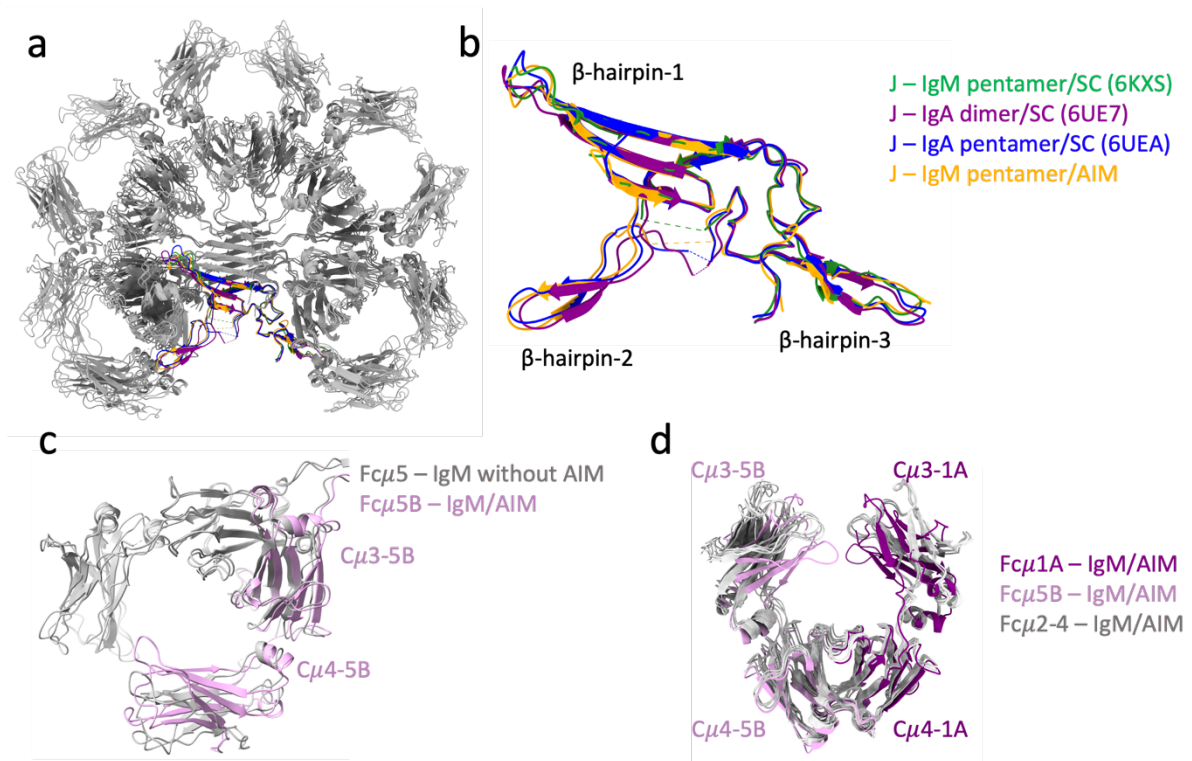

**Supplementary Fig. 7. Comparison of J chain in Fc $\mu$ /J/AIM to other polymeric immunoglobulin structures.** (a) Overlay of polymeric Ig structures aligned at J chains. The Fc regions are all in grey, J chains are in various colours listed in the legend in panel b. (b) Zoomed-in view of J chains in different structures. (c) Superposition of subunit Fc $\mu$ 5 of IgM without AIM (in grey, pdb id 8ADY) and with AIM (Fc $\mu$ 5A in grey, Fc $\mu$ 5B in purple). (d) Superposition of the five Fc $\mu$  subunits of Fc $\mu$ /J/AIM complex. Fc $\mu$ 1A in dark purple, Fc $\mu$ 5B in light purple, the other C $\mu$ 3 and C $\mu$ 4 domains are in grey.

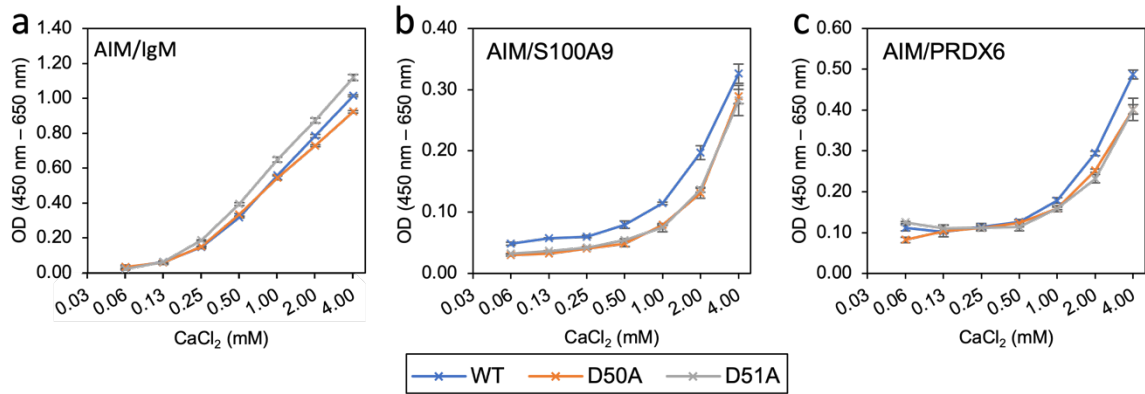

**Supplementary Fig. 8. AIM binding to IgM and DAMPs is not affected by mutation of potential calcium-binding residues in SRCR1.** (a) Binding between AIM (WT and mutants) and IgM at different calcium ion concentrations. (b) Binding between AIM (WT and mutants) and S100A9 at different calcium ion concentrations. (c) Binding between AIM (WT and mutants) and PRDX6 at different calcium ion concentrations. Error bars indicate the s.e.m. for three technical replicates. Data are representative of two biological replicates. Source data are provided as a Source Data file.



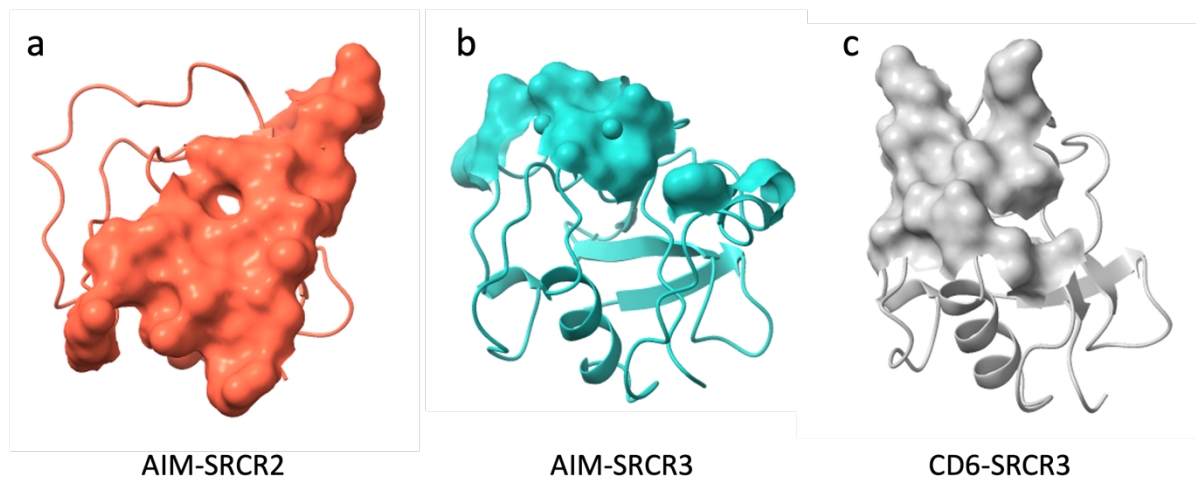

**Supplementary Fig. 9. Ligand binding interfaces of three SRCR domains.** (a) AIM-SRCR2 residues that contact IgM are shown as red surface. (b) AIM-SRCR3 residues that contact IgM are shown as cyan surface. (c) CD6-SRCR3 (pdb id 5A2E) with residues implicated in CD166 binding in grey (as described in Methods).

**Supplementary Table 1. Cryo-EM data collection, processing and validation statistics**

|                                          | global refinement<br>F <sub>ctf</sub> /J/ÅIM<br>pdb id 8R83 | local refinement F <sub>ctf</sub> /J/ÅIM<br>pdb id 8R84 |
|------------------------------------------|-------------------------------------------------------------|---------------------------------------------------------|
| <b>Data Acquisition</b>                  |                                                             |                                                         |
| Voltage                                  | 300 kV                                                      |                                                         |
| Microscope                               | FEI Titan Krios                                             |                                                         |
| Camera                                   | K2, counting                                                |                                                         |
| Calibrated magnification                 | 59,101                                                      |                                                         |
| Electron exposure                        | 52.4 e/Å <sup>2</sup>                                       |                                                         |
| Exposure rate                            | 10.48 e/Å <sup>2</sup> /s                                   |                                                         |
| Number of frames per movie               | 40                                                          |                                                         |
| Energy filter slit width                 | 20 eV                                                       |                                                         |
| Automation software                      | EPU                                                         |                                                         |
| Stage tilt                               | 0°                                                          |                                                         |
| Defocus range                            | -1.2 to -3.5 μm                                             |                                                         |
| Pixel size                               | 0.846 Å                                                     |                                                         |
| <b>Data processing</b>                   |                                                             |                                                         |
| Data processing packages                 | Relion, CryoSPARC, CrYOLO                                   |                                                         |
| Initial particle images                  | 3,266,779                                                   |                                                         |
| Symmetry imposed                         | C1                                                          | C1                                                      |
| Final particle images                    | 501,789                                                     | 501,789                                                 |
| Half-map FSC (0.5, masked/unmasked, Å)   | 4.08/4.42                                                   | 4.20/8.08                                               |
| Half-map FSC (0.143, masked/unmasked, Å) | 3.57/4.13                                                   | 3.60/4.32                                               |
| Map B factor (Å <sup>2</sup> )           | 134                                                         | 98                                                      |
| Map sharpening method                    | Global B-factor sharpening in CryoSparc                     |                                                         |
| <b>Model Refinement</b>                  |                                                             |                                                         |
| Initial model used                       | 8BPF, AlphaFold prediction of human CD5L                    |                                                         |
| Refinement/validation packages           | Phenix, Coot, CCPEM, Privateer                              |                                                         |
| Map-model FSC (0.5, masked, Å)           | 3.7                                                         | 3.6                                                     |
| Map-model CC                             |                                                             |                                                         |
| CC_mask                                  | 0.68                                                        | 0.70                                                    |
| CC_volume                                | 0.69                                                        | 0.71                                                    |
| CC_peaks                                 | 0.56                                                        | 0.51                                                    |
| CC_box                                   | 0.61                                                        | 0.61                                                    |
| Model composition                        |                                                             |                                                         |
| Non-hydrogen atoms                       | 20415                                                       | 7470                                                    |
| Protein residues                         | 2608                                                        | 951                                                     |
| Ligands                                  | NAG: 8<br>CA: 2                                             | NAG: 2<br>CA: 2                                         |
| Validation                               |                                                             |                                                         |
| MolProbity score                         | 1.47                                                        | 1.56                                                    |
| Clashscore                               | 4.37                                                        | 4.29                                                    |
| Rotamer outliers (%)                     | 0                                                           | 0                                                       |
| Ramachandran outliers (%)                | 0                                                           | 0                                                       |
| Cβ outliers (%)                          | 0                                                           | 0                                                       |
| Planarity outlier                        | 0                                                           | 0                                                       |
| Chirality outlier                        | 2                                                           | 0                                                       |
| Bond length outlier                      | 0                                                           | 0                                                       |
| Bond angle outlier                       | 4                                                           | 2                                                       |
